# Supplementary material for: Synthesis and properties of a meso- tris–ferrocene appended zinc(ii) porphyrin and a critical evaluation of its dye sensitised solar cell (DSSC) performance
Source: Royal Society of Chemistry journal article supplement (doi:10.1039/c4ra03105a), 2014-01-01
Supplement: c4ra03105a1.pdf [file c4ra03105a1.pdf]

## Supporting Information

Dumitru Sirbu, Constantin Turta, Andrew C. Benniston, Fawzi Abou-Chahine, Helge

Lemmetyinen, Nikolai V. Tkachenko, Christopher Wood and Elizabeth Gibson

**S1.** Computer calculated structures for **F3P** showing the bow in the porphyrin ring. Top B3LYP (3-21G\*), middle B3LYP (LanL2DZ), bottom B3PW91 (6-31G(d)). Groups are omitted for clarity.

**S2.** Selected molecular orbitals for **F3P** calculated by DFT (B3LYP) and using the 3-21G\* basis set.

**S3.** Selected molecular orbitals for **F3P** calculated by DFT (B3LYP) and using the LanL2DZ basis set.

**S4.** DFT calculated electron density map for **F3P** using B3PW91 and a 6-31G(d) basis set.

**S5.** Cyclic voltammogram for **F3P** in THF (0.2 M TBATFB) at a glassy carbon working electrode. Scan rate = 50 mV s<sup>-1</sup>.

**S6.** Time resolved transient absorption spectra of **F3P** attached to TiO<sub>2</sub> (top), and transient absorption decay profiles at three selected wavelengths (top). Symbols are experimental data and curves are the data fits.

**S7.** Decay component spectra for **ZnTPP** supported on TiO<sub>2</sub>. Excitation wavelength is 550 nm.

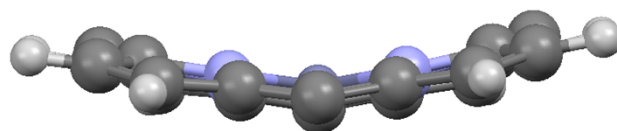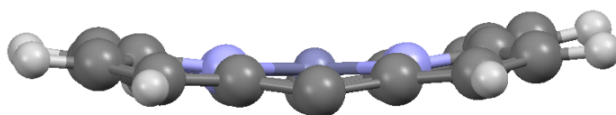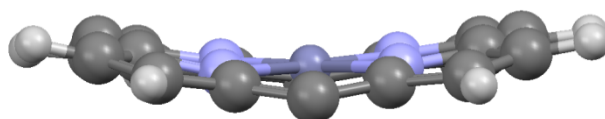

**S1.** Computer calculated structures for **F3P** showing the bow in the porphyrin ring. Top B3LYP (3-21G\*), middle B3LYP (LanL2DZ), bottom B3PW91 (6-31G(d)). Groups are omitted for clarity.

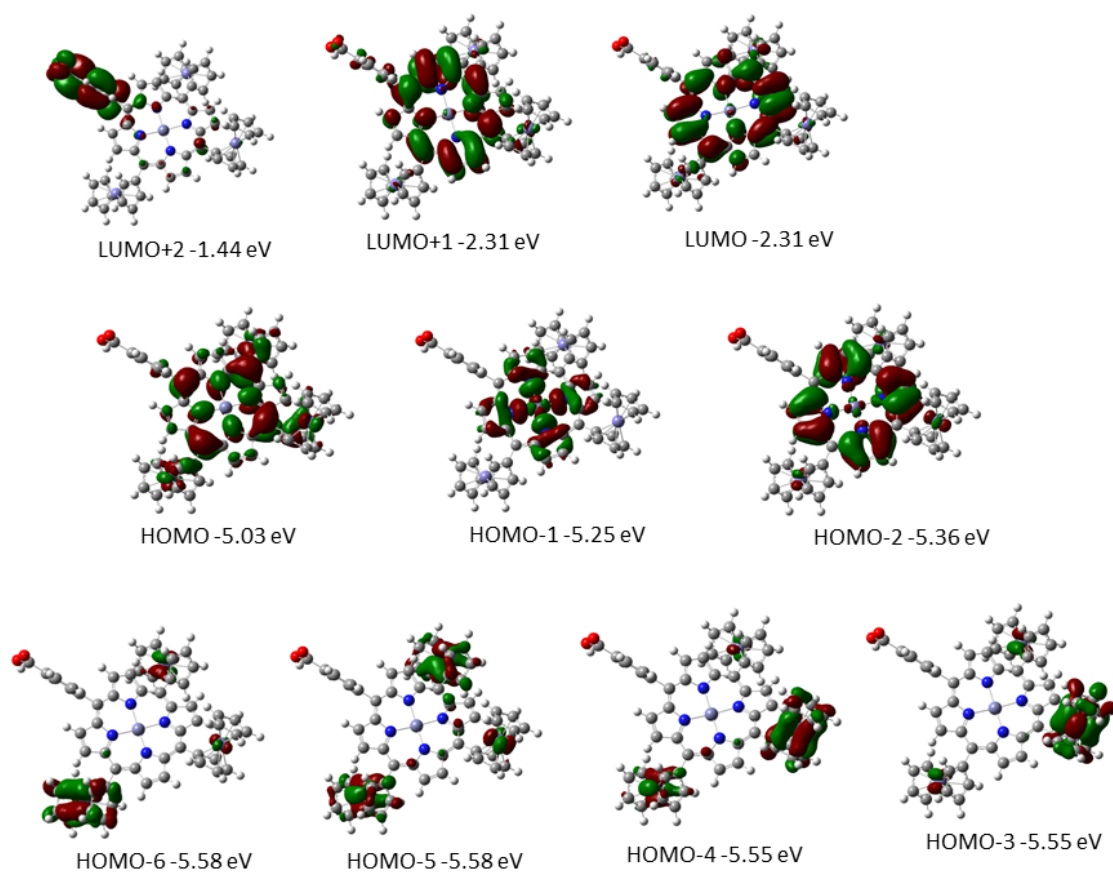

**S2.** Selected molecular orbitals for **F3P** calculated by DFT (B3LYP) and using the 3-21G\* basis set.

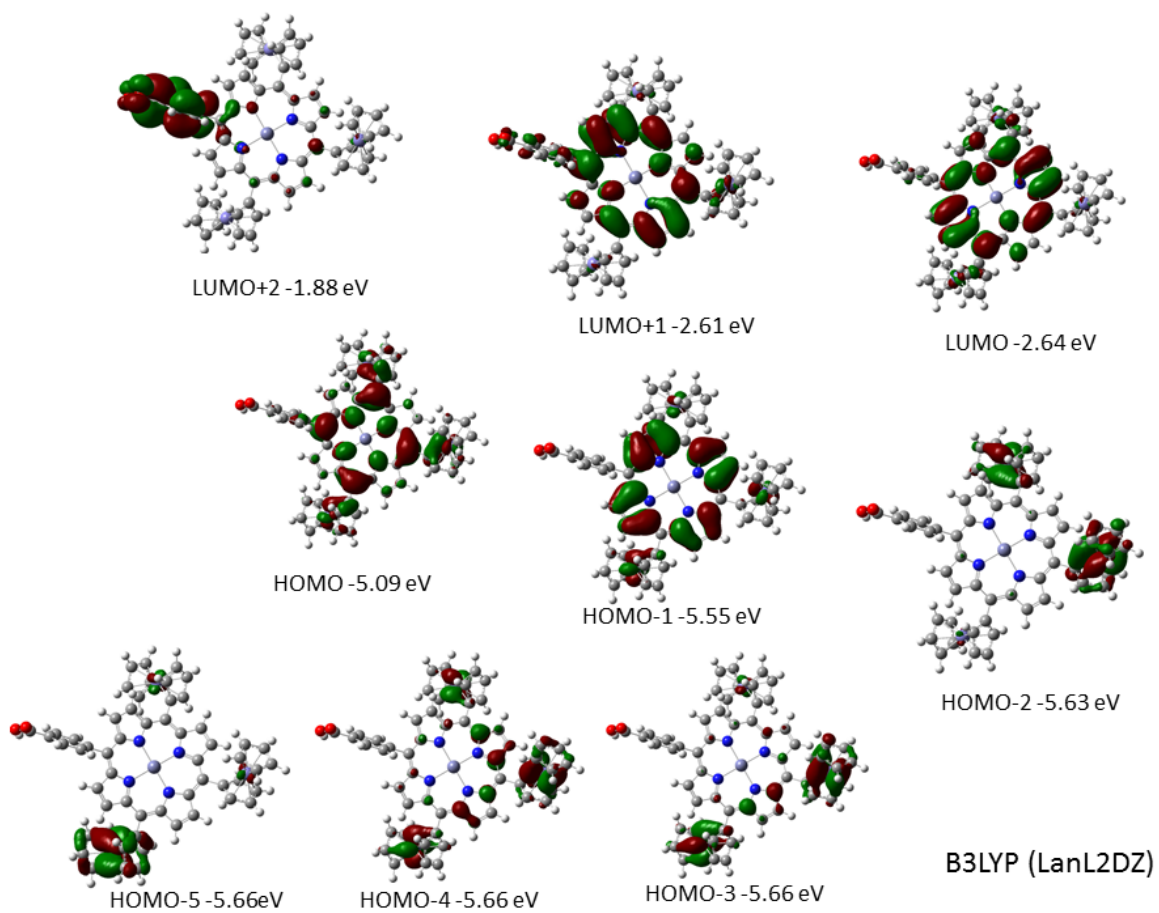

**S3.** Selected molecular orbitals for **F3P** calculated by DFT (B3LYP) and using the LanL2DZ basis set.

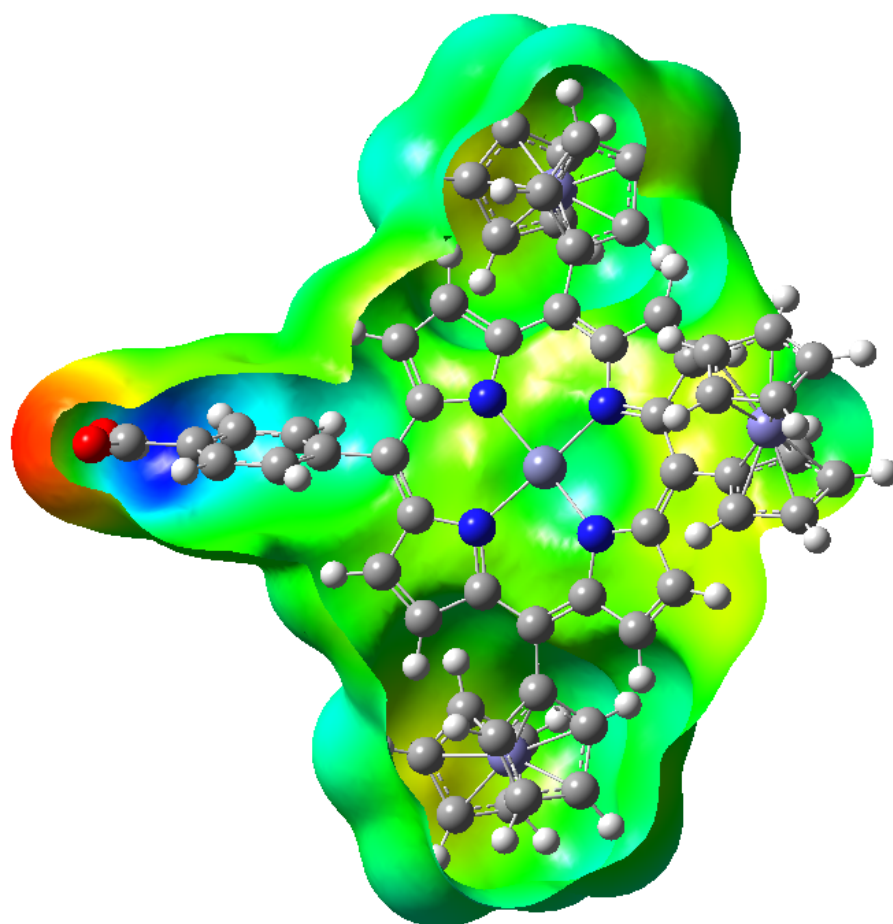

**S4.** DFT calculated electron density map for **F3P** using B3PW91 and a 6-31G(d) basis set.

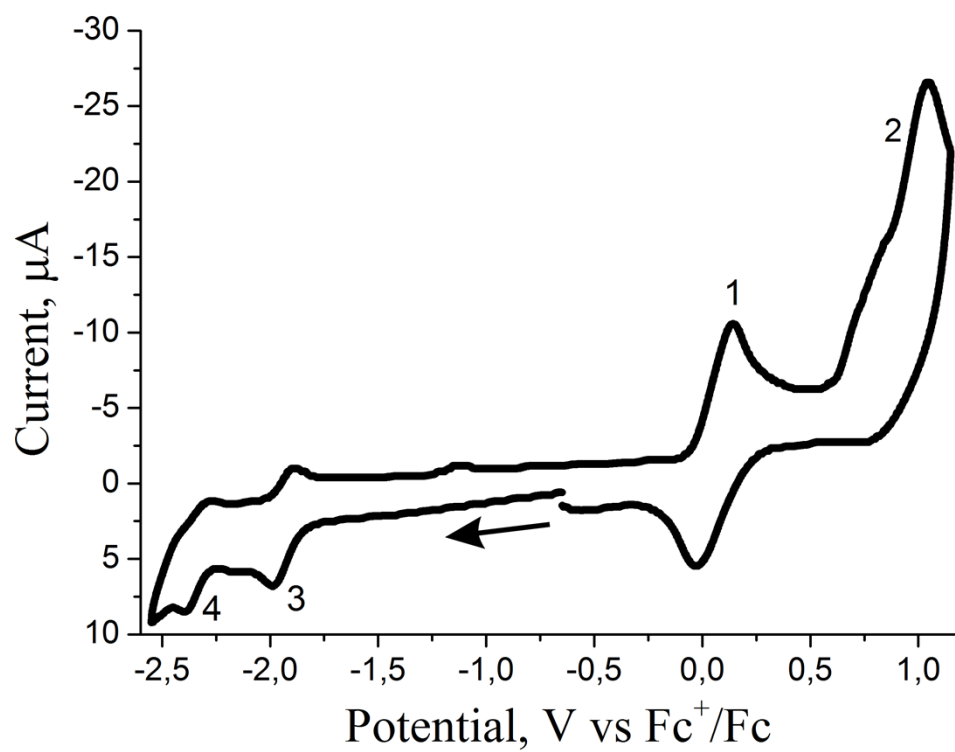

**S5.** Cyclic voltammogram for **F3P** in THF (0.2 M TBATFB) at a glassy carbon working electrode. Scan rate =  $50 \text{ mV s}^{-1}$ .

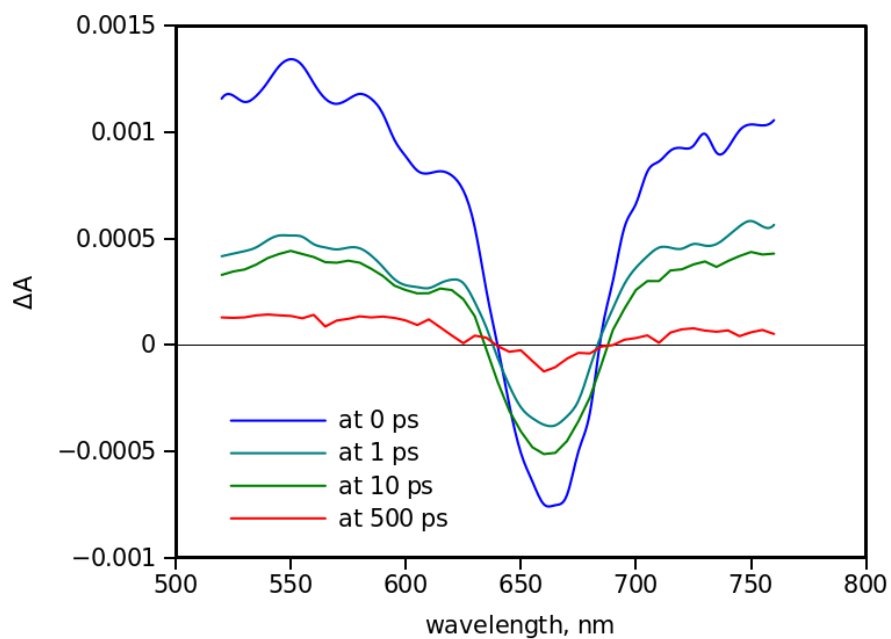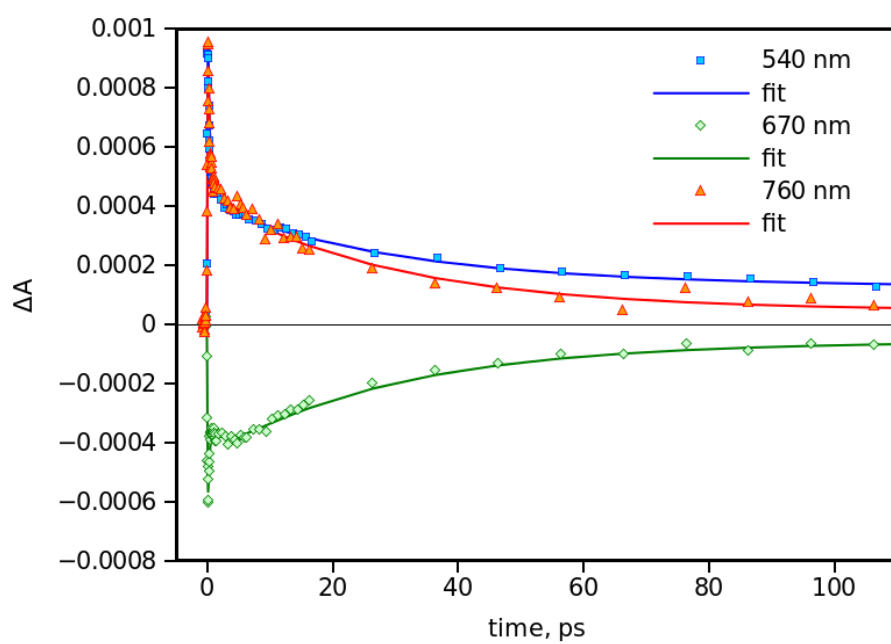

**S6.** Time resolved transient absorption spectra of **F3P** attached to  $\text{TiO}_2$  (top), and transient absorption decay profiles at three selected wavelengths (top). Symbols are experimental data and curves are the data fits.

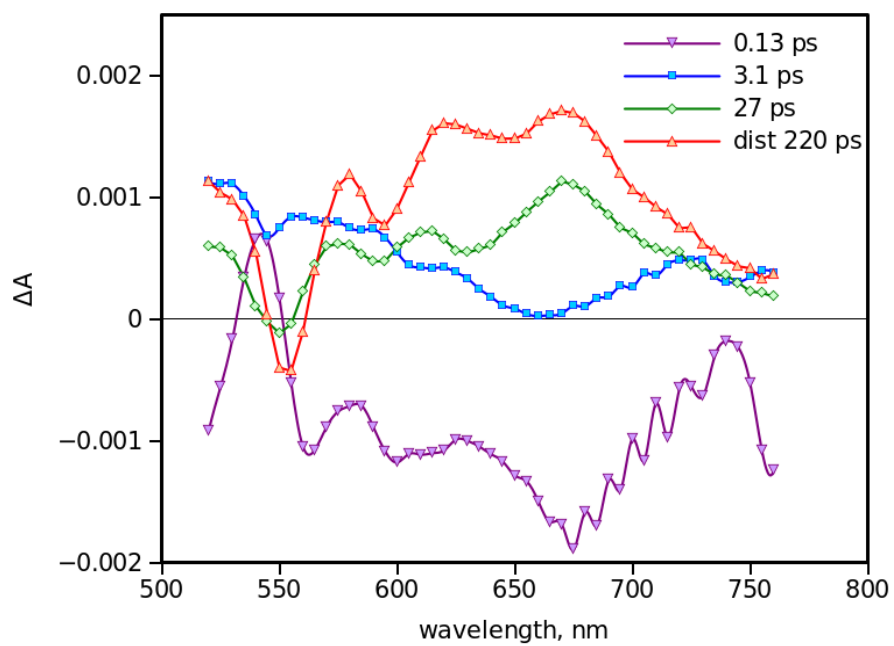

**S7.** Decay component spectra for **ZnTPP** supported on TiO<sub>2</sub>. Excitation wavelength is 550 nm.
